# Supplementary material for: Platinum–graphene hybrid nanostructure as anode and cathode electrocatalysts in proton exchange membrane fuel cells
Source: Royal Society of Chemistry journal article supplement (doi:10.1039/c3ta15181f), 2014-01-01
Supplement: c3ta15181f1.pdf [file c3ta15181f1.pdf]

## Supporting Information

### **Pt-Graphene hybrid nanostructure as anode and cathode electrocatalyst in proton exchange membrane fuel cells**

P. Divya and S. Ramaprabhu

Alternative Energy and Nanotechnology Laboratory (AENL), Nano Functional Materials  
Technology centre (NFMTTC), Department of Physics, Indian Institute of Technology Madras,  
India. \* Phone: +91-44-22574862; E-mail: ramp@iitm.ac.in

#### **1. Structural analysis**

Structural analysis of the samples (graphite, GO, L-ARGO, as grown MWNTs, air oxidized MWNTs, MWNTs, f-MWNTs) has been carried out by recording the powder XRD pattern. The peak centered at  $2\theta=26.5^\circ$  (Fig. S1 (a)) corresponds to the (002) hexagonal planes of crystalline graphite. In Fig. S1 (b), shift of (002) peak to  $2\theta= 10^\circ$  shows an increase in interlayer spacing. This confirms the successful oxidation of graphite by intercalation of oxygen containing functional groups. After reduction, the peak shifted back to  $2\theta = 26.5^\circ$  with broadening indicates the removal of functional groups during reduction of GO and loss of long range order (Fig. S1(c)). In Fig. S1 (d-g) the diffraction peaks at  $2\theta=26.5^\circ$  corresponds to (002) hexagonal graphitic plane. The other peaks denoted by ‘\*’ shows the presence of catalyst impurity (MmNi<sub>3</sub>-H). The peaks for MmNi<sub>3</sub>-H are not defined since after hydrogenation the material shows amorphization which results shift in peak position. The absence of MmNi<sub>3</sub>-H peaks in MWNTs confirms removal of catalyst impurities by acid treatment.

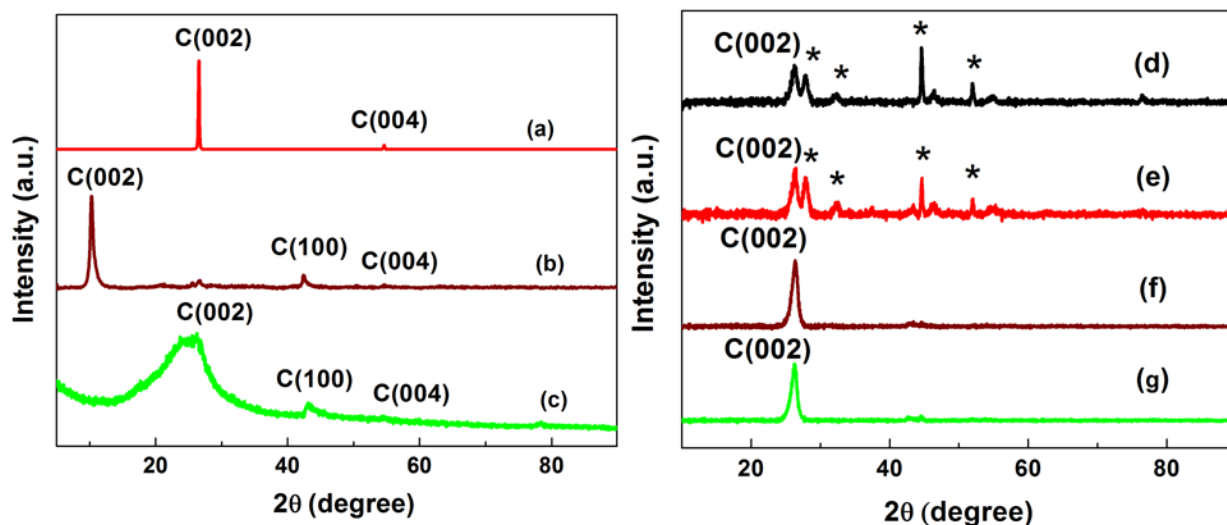

**Fig. S1.** XRD of (a) graphite, (b) GO, (c) L-ARGO, (d) as grown MWNTs, (e) air oxidized MWNTs, (f) MWNTs and (g) f-MWNTs.

An investigation of the functional groups present in graphite, GO and L-ARGO, MWNTs and f-MWNTs are done by FTIR analysis. Fig. S2 (a -c) show the FTIR spectra of Graphite, GO, Graphene. The graphite spectrum contains broad peak centered at  $3454\text{ cm}^{-1}$  and  $1624\text{ cm}^{-1}$  due to the vibrations of water molecules. The peaks at  $2924\text{ cm}^{-1}$  and  $2858\text{ cm}^{-1}$  represents symmetric and antisymmetric stretching vibrations of  $-\text{CH}_2$ <sup>1</sup>. GO contains highly broadened and intense peaks at  $3454\text{ cm}^{-1}$  and at  $1624\text{ cm}^{-1}$  indicates the stretching vibrations  $-\text{OH}$  represents that the GO samples contain large quantity of adsorbed water<sup>2</sup>. Intense peaks of  $\text{C}=\text{O}$  and  $\text{C}-\text{O}$  stretching vibrations of  $\text{COOH}$  groups at  $1725\text{ cm}^{-1}$  and  $1390\text{ cm}^{-1}$  can also be found<sup>3</sup>. After reduction the  $-\text{OH}$  functional groups are removed completely. The presence of peaks at  $2924\text{ cm}^{-1}$  and  $2858\text{ cm}^{-1}$  corresponding to the vibrations of  $-\text{CH}_2$ <sup>4</sup>. The intensities of peaks at  $1725\text{ cm}^{-1}$ ,  $1370\text{ cm}^{-1}$  and  $1390\text{ cm}^{-1}$  corresponding to  $\text{C}=\text{O}$ ,  $\text{C}-\text{O}$  and  $-\text{OH}$  of  $\text{COOH}$  groups also reduced after reduction shows a partial removal of the these groups in the form of water vapour<sup>5</sup>.

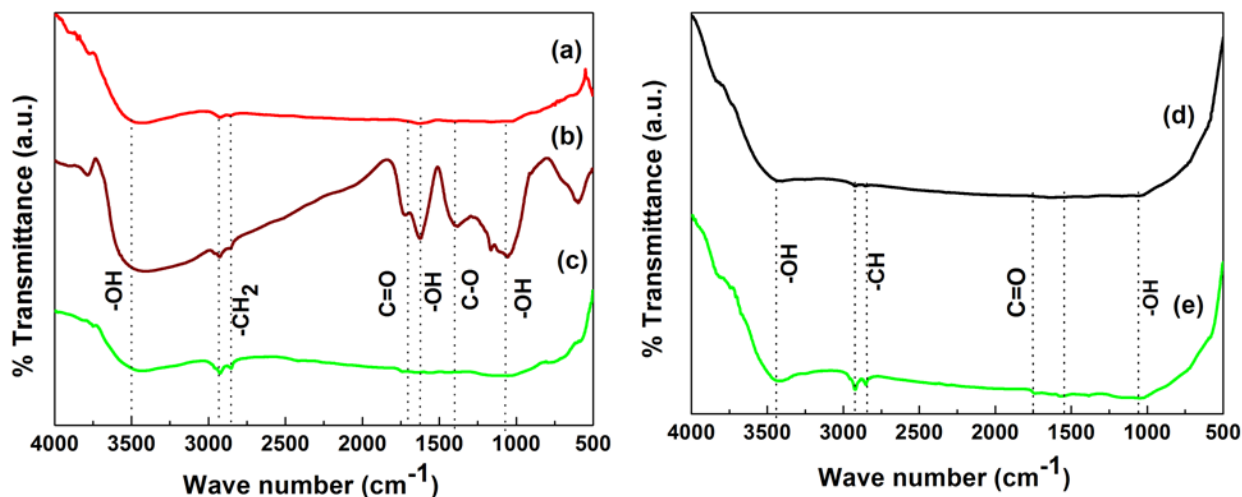

**Fig. S2.** FTIR spectrum of (a) graphite, (b) GO, (c) L-ARGO, (d) MWNTs and (e) f-MWNTs.

Functional groups on the surface of MWNTs by acid functionalization process act as anchoring sites for the attachment of metal nanoparticles. Fig. S2 (d & e) show the FTIR spectra of MWNTs and f-MWNTs. In f-MWNTs, a strong and broad peak can be seen around  $3427\text{ cm}^{-1}$ , which corresponds to stretching mode of OH functional groups<sup>6, 7</sup> and bands around  $2922\text{ cm}^{-1}$  and  $2874\text{ cm}^{-1}$  are attributed to the asymmetric and symmetric stretching of C-H bond. The peak at  $1634\text{ cm}^{-1}$  is due to the C=C stretching mode and the peak at  $1384\text{ cm}^{-1}$  is due C-O stretching vibrations of COOH groups<sup>8, 9</sup>.

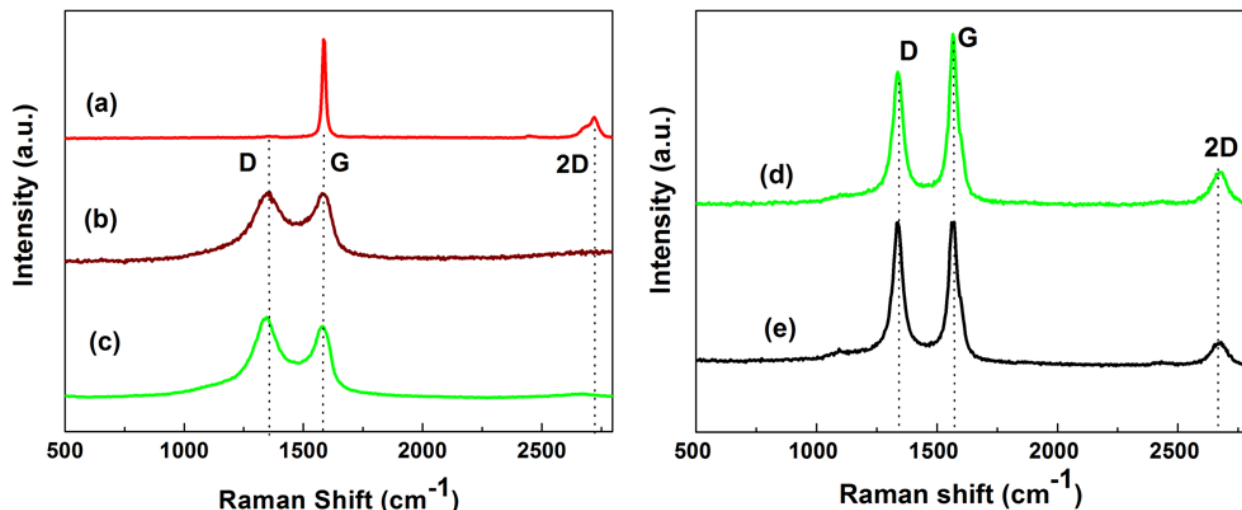

**Fig. S3.** Raman spectra of (a) graphite, (b) GO and (c) L-ARGO. (d) MWNTs and (e) f-MWNTs.

Raman spectroscopy is a tool which is used to identify carbonaceous samples from their vibrational spectra. Fig. S3 (a) – (c) shows the Raman spectra of graphite, GO, L-ARGO. The absence of the D- band peak in graphite indicates which is defect free. The presence of peak at  $2717\text{ cm}^{-1}$  is the overtone of the D band called 2D band. G band, corresponding to the  $E_{2g}$  mode of  $sp^2$  carbon atoms at  $1582\text{ cm}^{-1}$ <sup>10</sup>. The G band of GO is located at  $1596\text{ cm}^{-1}$ , while that of L-ARGO is shifted back to  $1584\text{ cm}^{-1}$  due to the reduction of GO. The chemical treatments followed to obtain GO and its reduction to get L-ARGO induce defects in the graphitic structure. The ratio between the intensities of the D and G bands is used to identify the presence of defects in the samples. The ratio of the intensities of the D and G bands,  $I_D/I_G$ , is calculated to measure the degree of defects<sup>11</sup>. Fig. S3 (d & e) show the Raman spectra of purified MWNTs, f-MWNTs. the peak at  $1576\text{ cm}^{-1}$  (G-band) is due to the Raman-active  $E_{2g}$  mode analogous to that of graphite<sup>12</sup>, while the peak at  $1348\text{ cm}^{-1}$  is D band, which is due to the defects or disorder present in MWNTs<sup>13, 14</sup>. The intensity of D-band is an indication of degree of disorder present in the nanotube. In f-MWNTs, the intensity of the D-band is higher since the functionalization adds carboxyl and hydroxyl functional groups on MWNTs which acts as anchoring sites for metal nanoparticles decoration. Table S1 shows the  $I_D/I_G$  ratio.

**Table S1.**  $I_D/I_G$  calculated from Raman spectra.

| sample   | $I_D/I_G$ |
|----------|-----------|
| MWNTs    | 0.95194   |
| f-MWNTs  | 0.9788    |
| Graphite | 0.5923    |
| GO       | 0.9975    |
| L-ARGO   | 1.0458    |

## 2. FESEM and TEM images

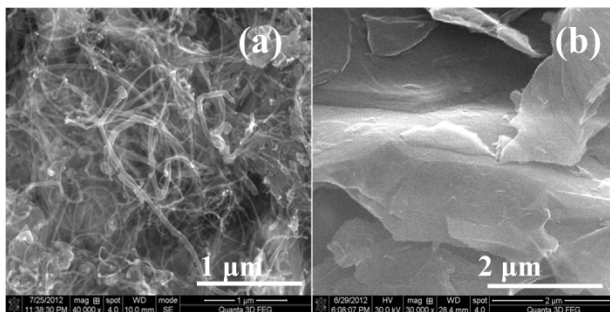

**Fig. S4.** FESEM images of (a) as grown MWNTs, (b) Graphite

## 3. Thermogravimetric analysis (TGA)

Fig. S5 shows the thermogravimetric analysis of Pt/L-ARGO and Pt/f-MWNTs in air atmosphere within a temperature range of room temperature to 1200 °C. TGA was carried out using a SDT Q600, TA instruments. The weight loss below 200 °C is observed due to the adsorbed water content in the sample. The weight percent shown after 700 °C is corresponding to loading level of platinum in the sample. The loading of platinum remaining in Pt/L-ARGO and Pt/f-MWNTs is 34 wt% and 30 wt% respectively.

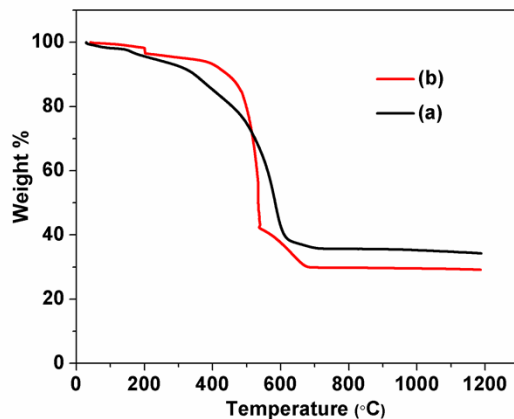

**Fig. S5.** TGA curve of (a) Pt/L-ARGO and (b) Pt/f-MWNTs

#### 4. Polarization Curves

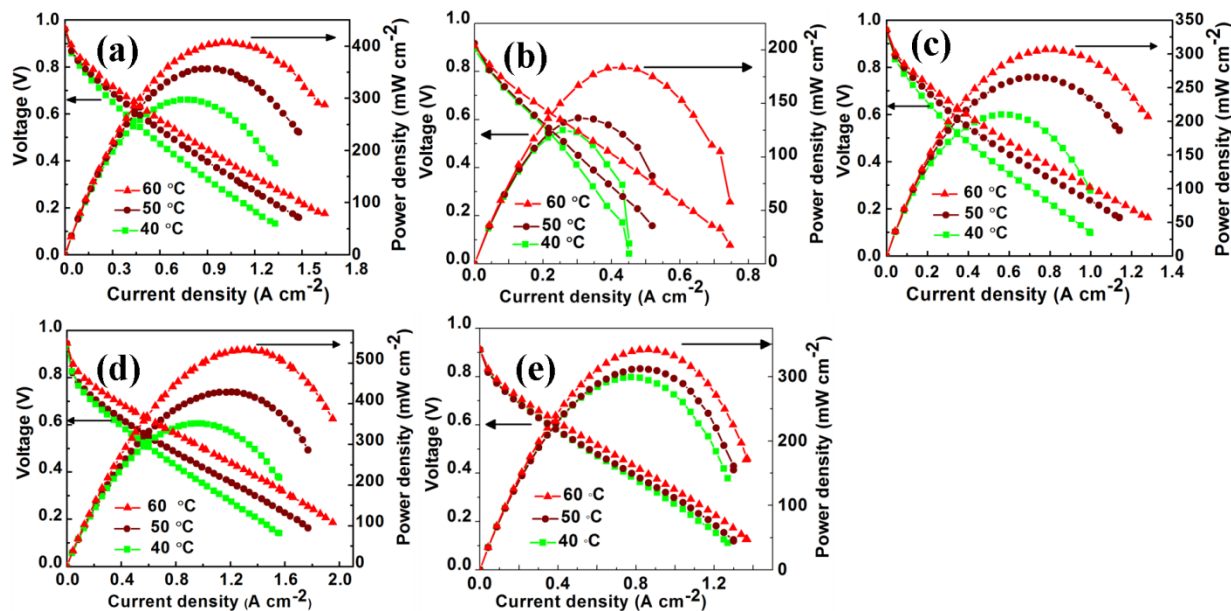

**Fig. S6.** Polarization curves recorded at 40 °C, 50 °C and 60 °C with one atmospheric back pressure for (a) MEA-1, (b) MEA-2, (c) MEA-3, (d) MEA-4 and (e) MEA-5

#### REFERENCES

1. G. I. Titelman, V. Gelman, S. Bron, R. L. Khalfin, Y. Cohen and H. Bianco-Peled, *Carbon*, 2005, **43**, 641-649.
2. X. Sun, Z. Liu, K. Welsher, J. Robinson, A. Goodwin, S. Zaric and H. Dai, *Nano Res.*, 2008, **1**, 203-212.
3. H.-K. Jeong, L. Colakerol, M. H. Jin, P.-A. Glans, K. E. Smith and Y. H. Lee, *Chemical Physics Letters*, 2008, **460**, 499-502.
4. G. Wang, B. Wang, J. Park, J. Yang, X. Shen and J. Yao, *Carbon*, 2009, **47**, 68-72.
5. W. Gao, L. B. Alemany, L. Ci and P. M. Ajayan, *Nat Chem*, 2009, **1**, 403-408.
6. W. Qian, T. Liu, F. Wei, Z. Wang, G. Luo, H. Yu and Z. Li, *Carbon*, 2003, **41**, 2613-2617.
7. N. I. Kovtyukhova, T. E. Mallouk, L. Pan and E. C. Dickey, *Journal of the American Chemical Society*, 2003, **125**, 9761-9769.
8. N. B. Colthup, L. H. Daly and Wiberlay, *Introduction to Infrared and Raman Spectroscopy*, Academic Press: Boston, 1990.
9. U. J. Kim, C. A. Furtado, X. Liu, G. Chen and P. C. Eklund, *Journal of the American Chemical Society*, 2005, **127**, 15437-15445.
10. S. Reich and C. Thomsen, *Philos. Trans. R. Soc. London, Ser. A*, 2004, **362**, 2271-2288.
11. C. C. Chuang, J. H. Huang, W. J. Chen, C. C. Lee and Y. Y. Chang, *Diamond and Related Materials*, 2004, **13**, 1012-1016.
12. A. C. Ferrari, *Solid State Communications*, 2007, **143**, 47-57.
13. M. S. Dresselhaus, A. Jorio, M. Hofmann, G. Dresselhaus and R. Saito, *Nano Letters*, 2010, **10**, 751-758.

14. A. C. Ferrari and J. Robertson, *Physical Review B*, 2000, **61**, 14095-14107.
